# Supplementary material for: Boundary conditions investigation to improve computer simulation of cerebrospinal fluid dynamics in hydrocephalus patients
Source: PubMed Central journal article supplement (PMC7988041; doi:10.1038/s42003-021-01920-w), 2021-03-23
Supplement: 42003_2021_1920_MOESM2_ESM.pdf [file 42003_2021_1920_MOESM2_ESM.pdf]

## **Description of Additional Supplementary Files**

**File name:** Supplementary Data 1

**Description:** Raw data for Fig. 1a; source data for maximum aqueductal CSF stroke volume for healthy subjects and patients under BCs "A", "B", and "C".

**File name:** Supplementary Data 2

**Description:** Raw data for Figs. 3a-c; source data for the simulation data and CINE PC-MRI data of the maximum CSF velocity in the CA for healthy subjects and patients under BCs "A", "B", and "C".
